# Supplementary material
Source: MDPI journal article supplement (https://www.mdpi.com/2077-0472/12/3/348)
Supplement: s1 [file s1]

## **Supplementary Materials**

# **Future projection for climate suitability of summer maize in the North China Plain**

Yanxi Zhao<sup>1</sup>, Dengpan Xiao<sup>1</sup>, Huizi Bai<sup>1</sup>, Jianzhao Tang<sup>1</sup>, De Li Liu<sup>2</sup>

### **Contents:**

**Figure S1.** The spatial distribution of the change of maize climate suitability for the vegetative growth pe-riod (a,d,g,j), reproductive growth period (b,e,h,k) and whole growth period (c,f,i,l) under SSP245 during 2040s compared to the baseline period (1980–2010) in the NCP

**Figure S2.** The spatial distribution of the change of maize climate suitability for the vegetative growth pe-riod (a,d,g,j), reproductive growth period (b,e,h,k) and whole growth period (c,f,i,l) under SSP245 during 2080s compared to the baseline period (1980–2010) in the NCP

**Figure S3.** The simulated flowering date (a) and maturity date (b) of maize for different sowing dates in the NCP during 2040s and 2080s under SSP245 and SSP585

**Figure S4.** The simulated changes of flowering date and maturity date across the North China Plain during 2040s and 2080s under SSP245 and SSP585 compared to the baseline (1981–2010)

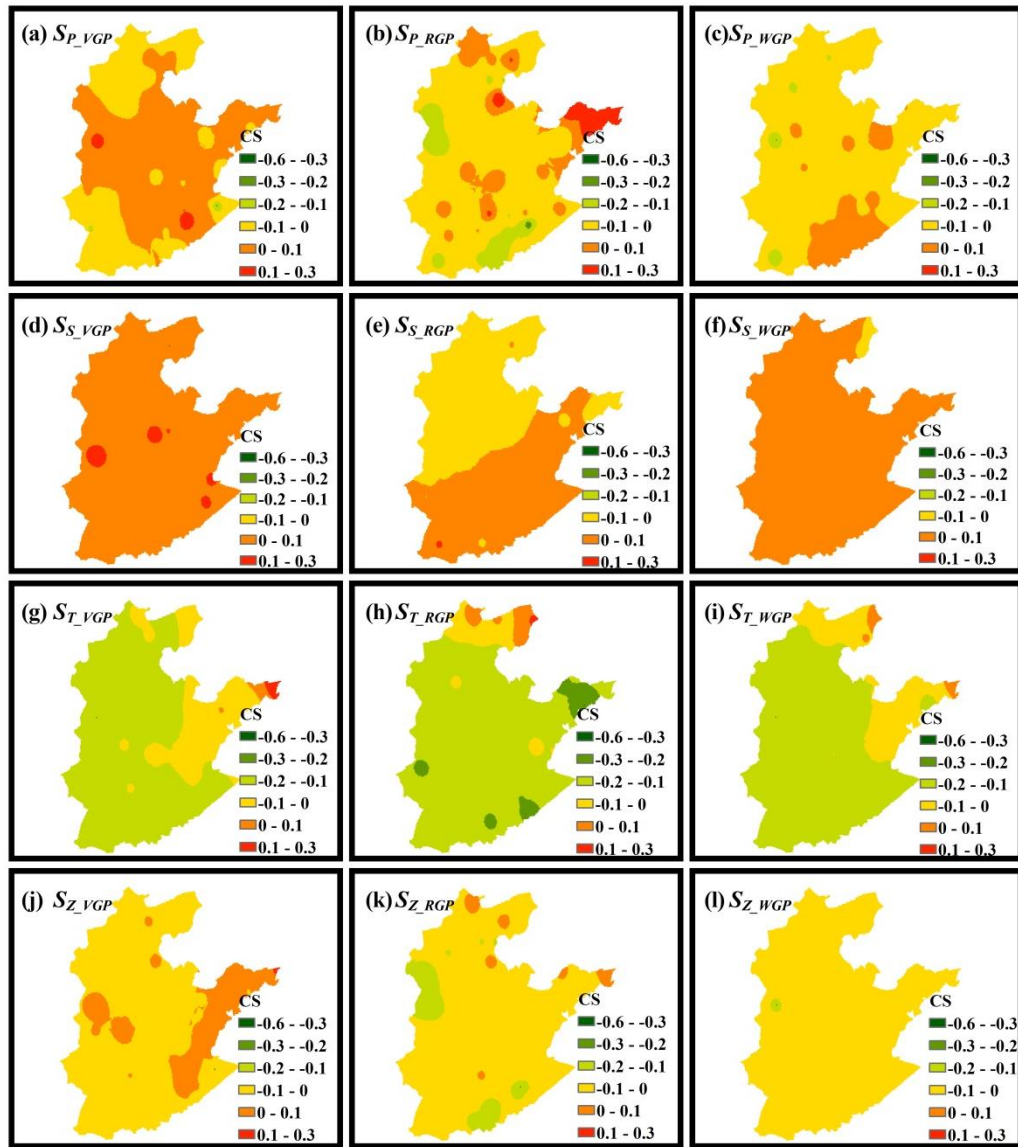

**Figure S1.** The spatial distribution of the change of maize climate suitability for the vegetative growth pe-riod (a,d,g,j), reproductive growth period (b,e,h,k) and whole growth period (c,f,i,l) under SSP245 during 2040s compared to the baseline period (1980–2010) in the NCP

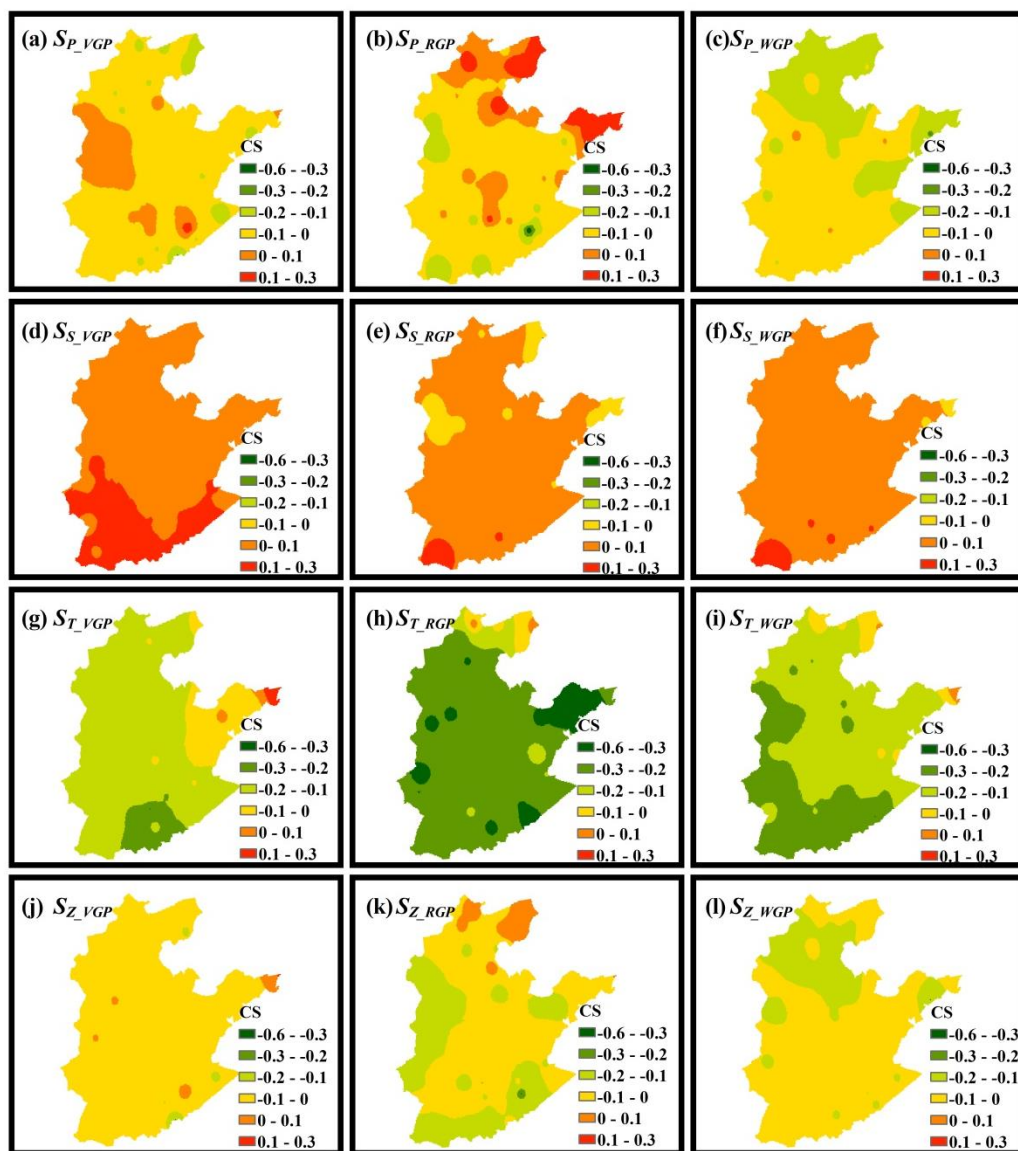

**Figure S2.** The spatial distribution of the change of maize climate suitability for the vegetative growth pe-riod (a,d,g,j), reproductive growth period (b,e,h,k) and whole growth period (c,f,i,l) under SSP245 during 2080s compared to the baseline period (1980–2010) in the NCP

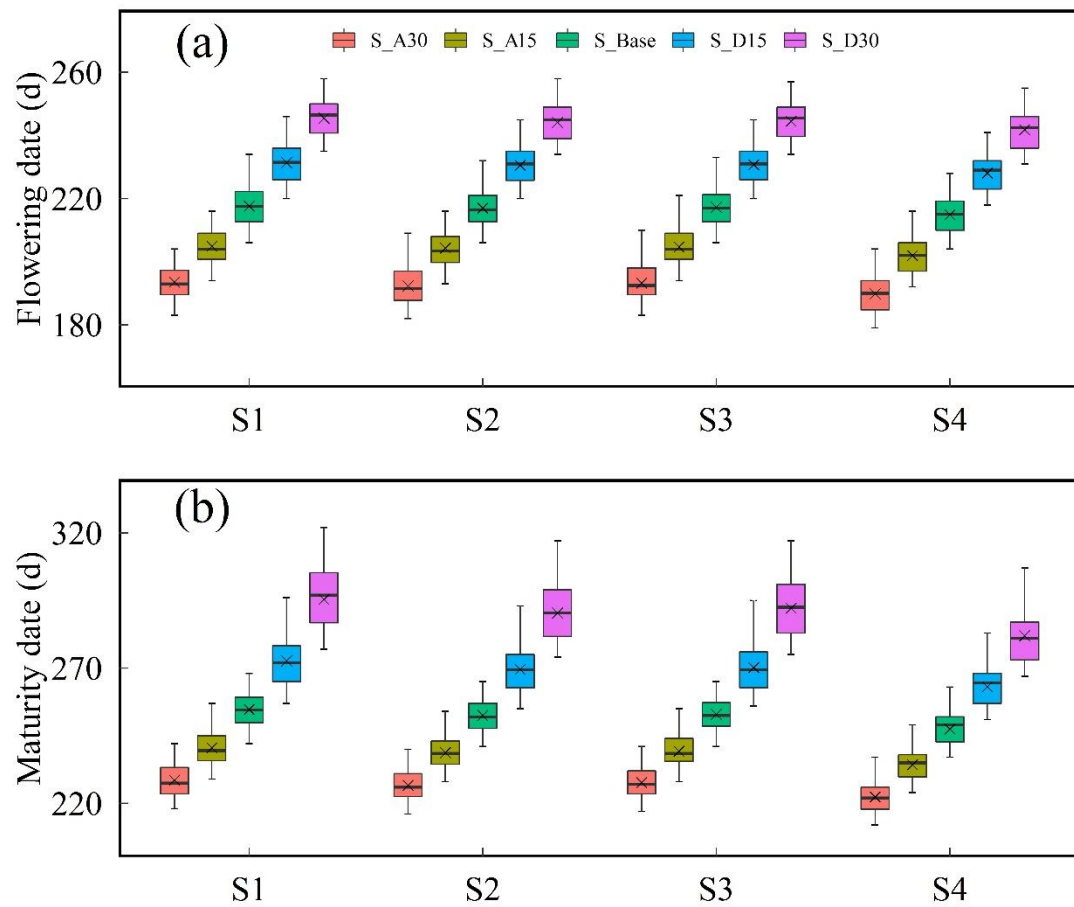

**Figure S3.** The simulated flowering date (a) and maturity date (b) of maize for different sowing dates in the NCP during 2040s and 2080s under SSP245 and SSP585

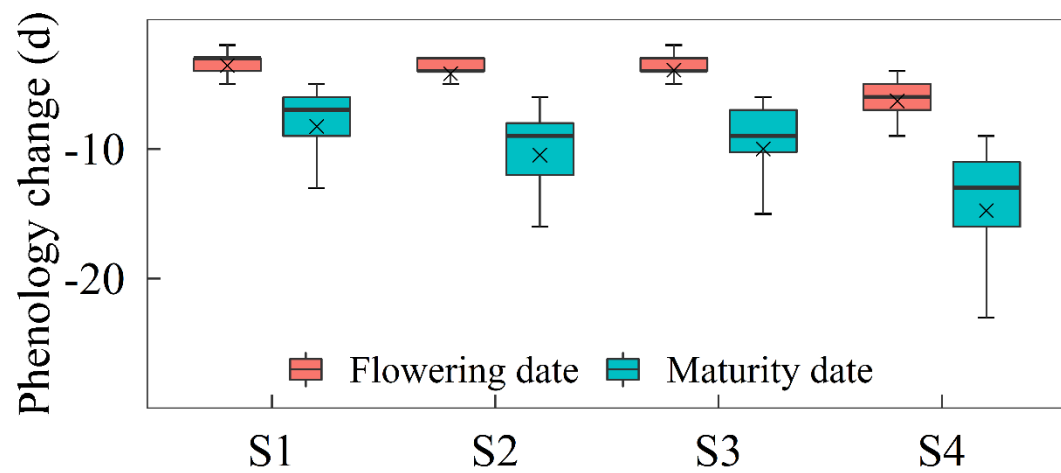

**Figure S4.** The simulated changes of flowering date and maturity date across the North China Plain during 2040s and 2080s under SSP245 and SSP585 compared to the baseline (1981–2010)
